# Supplementary material
Source: Springer Nature journal article supplement (https://www.springermedizin.de/resource/supplementary/13002_2013_347_MOESM3_ESM.pdf/9627666)

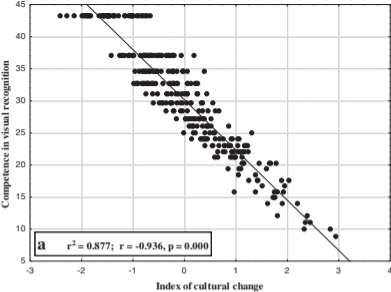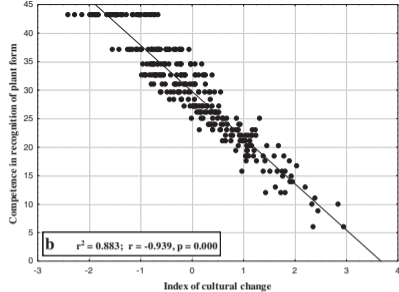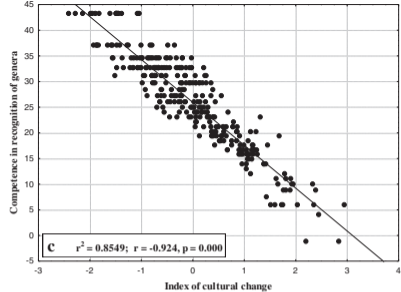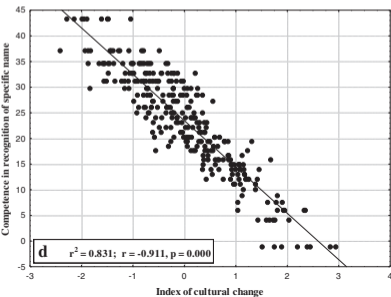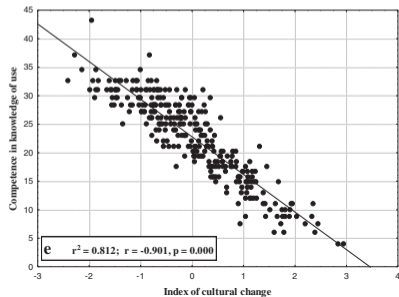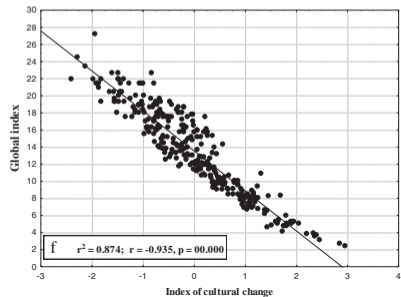

Supplement: MOESM3 [file 9627666]
